# Supplementary material
Source: MDPI journal article supplement (https://www.mdpi.com/2075-4701/13/11/1868)
Supplement: s1 [file s1]

# Hydrogen Production Properties of Aluminum–Magnesium Alloy Presenting $\beta$ -Phase $\text{Al}_3\text{Mg}_2$

Laurent Cuzacq <sup>1</sup>, Chloé Polido <sup>1</sup>, Jean-François Silvain <sup>1,2</sup> and Jean-Louis Bobet <sup>1,\*</sup>

<sup>1</sup> Department of Chemistry, University Bordeaux, CNRS, Bordeaux INP, ICMCB, UMR 5026, 33600 Pessac, France

<sup>2</sup> Department of Electrical and Computer Engineering, University of Nebraska-Lincoln, Lincoln, NE 68588, USA

\* Correspondence: jean-louis.bobet@u-bordeaux.fr

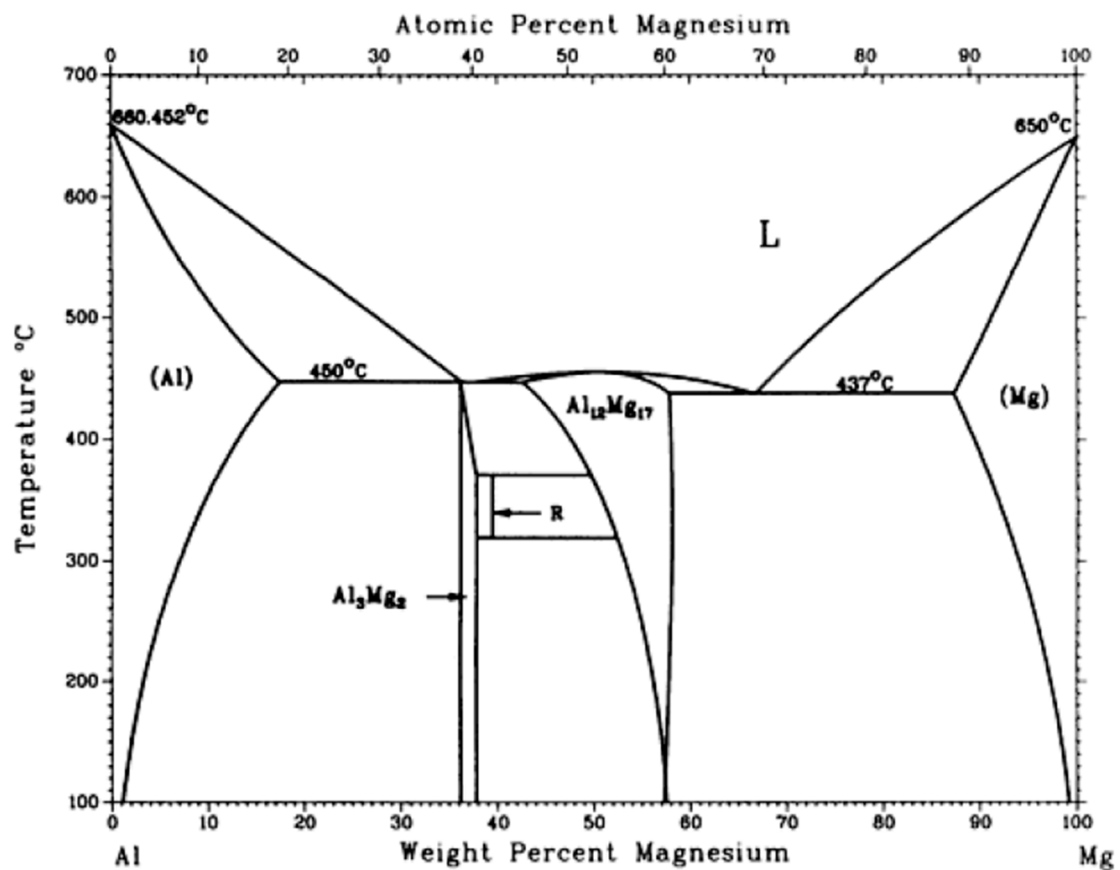

Figure S1: Al-Mg binary phase diagram. Reprinted with permission from ref. [5], Copyright 1992, ASM International.

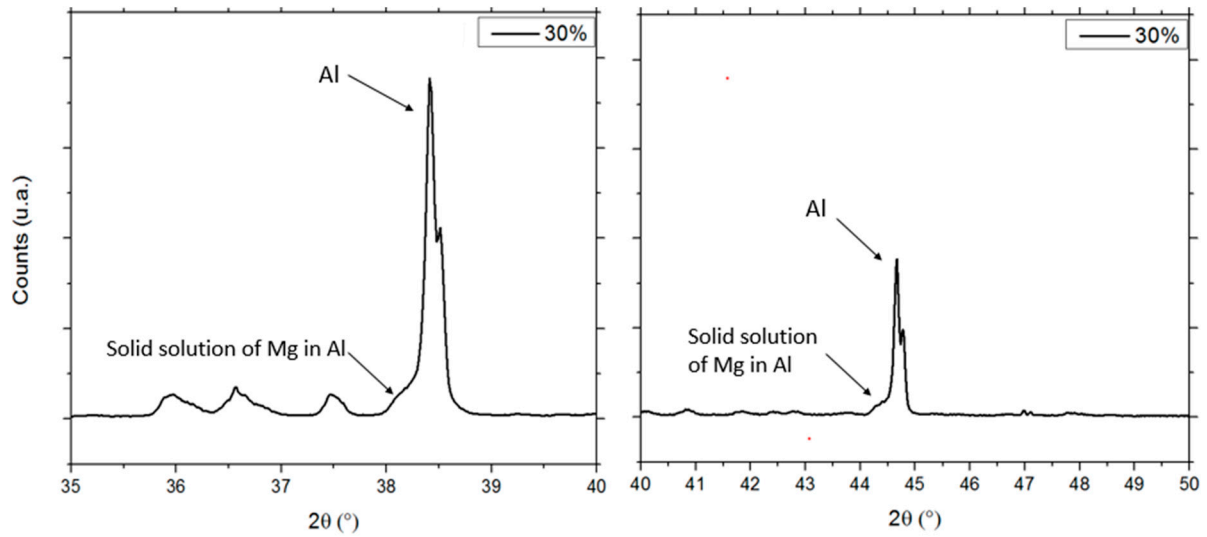

Figure S2: Zoom on the XRD of the 30 % porosity sample showing the solid solution of Mg in Al signature (shoulders on the Al peaks).

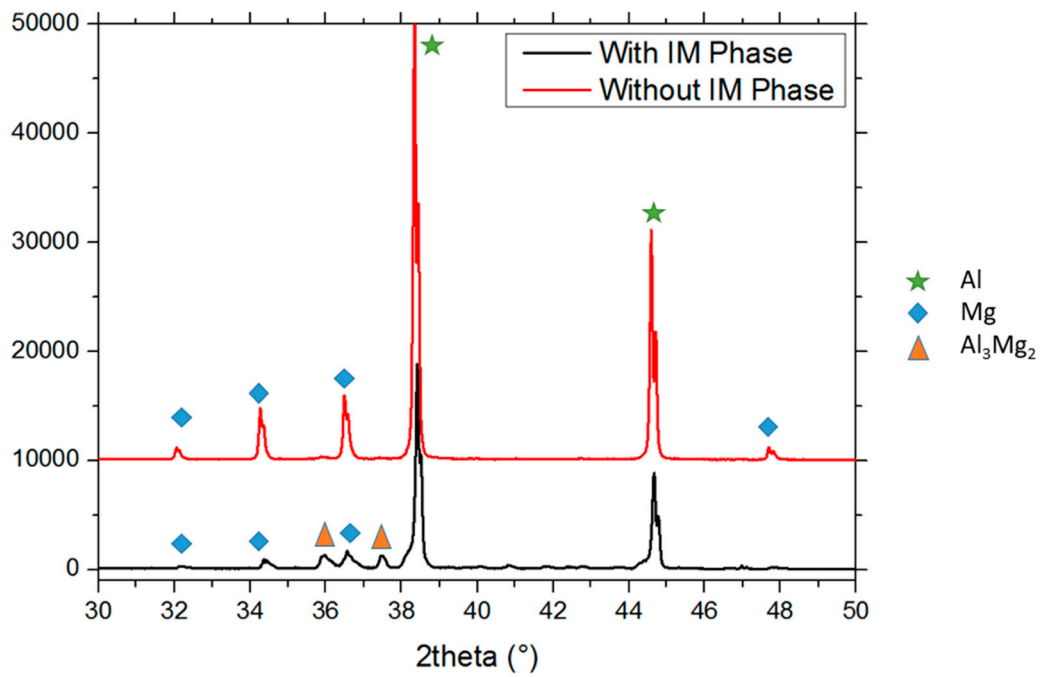

Figure S3: Comparison of XRD data for samples with the same porosity (30%) and with or without the IM phase.

## Reference

5. J.L. Murray, *ASM Handbook, Volume 3, Alloy Phase Diagrams*, ASM International: Novelty, OH, USA, 1992.
